# Supplementary material for: Edge Computing Based Applications in Vehicular Environments: Comparative Study and Main Issues
Source: Springer Nature journal article supplement (doi:10.1007/s11390-019-1947-3), 2019-07-01
Supplement: 11390_2019_1947_MOESM1_ESM.pdf [file 11390_2019_1947_MOESM1_ESM.pdf]

# Edge computing based applications in vehicular environments: *comparative study and main issues*

Mendiboure L, Chalouf MA, Krief F. Edge computing based applications in vehicular environments: Comparative study and main issues. JOURNAL OF COMPUTER SCIENCE AND TECHNOLOGY 34(4): 869–886 July 2019. DOI 10.1007/s11390-019-1947-3

**LaBRI**

## Authors

Mendiboure L., Chalouf M.A., Krief F.

université  
de **BORDEAUX**

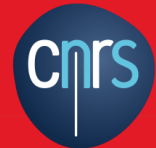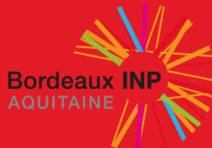

# Why Edge Computing should be integrated in the vehicular environment?

- Vehicular networks are supporting new applications with different characteristics and various needs
- The most common approach, based on Cloud Computing, presents some limitations in terms of:
  - QoS (latency, bandwidth)
  - Scalability
  - Security
- Edge Computing is an interesting new approach for vehicular applications
  - provides additional and near computational and storage capabilities, in order to achieve:
    - Lower latency
    - More bandwidth
    - Higher scalability

## Edge computing-based networks: Technologies comparison

| Edge Computing technologies | Supporting companies                                  |
|-----------------------------|-------------------------------------------------------|
| Cloudlet                    | Service providers<br>(Open Edge Computing Initiative) |
| Mobile Edge Computing (MEC) | Network operators<br>(ETSI ISG)                       |
| Fog Computing (FC)          | Manufacturers<br>(Open Edge Consortium)               |

- Thus, the considered (three) technologies present different characteristics in terms of:
  - Architecture
  - Operation (proximity, etc.)
  - Computational and storage capabilities (location, performances, etc.)
  - Used techniques and tools (context-awareness, etc.)

## Edge computing-based vehicular application

- For each Edge Computing technology, different vehicular applications were proposed:
  - implying some challenges (QoS, mobility, scalability, security, etc.)
  - using different approaches (content caching, resource management, etc.)
- For each application, we studied:
  - the Edge Computing technology choice and the approach
  - the benefits and the features
  - the remaining challenges
- For different vehicular applications, we defined the more suitable Edge Computing technology depending on its requirements: *cost, latency, storage and computational capabilities, etc.*

| Technology            | Applications                                          |
|-----------------------|-------------------------------------------------------|
| Cloudlet              | Infotainment, Advertising, Transport Management, etc. |
| Fog Computing         | Road Safety applications, Driver Assistance, etc.     |
| Mobile Edge Computing | Transport Management, Network Services, etc.          |

## Open issues and future directions

- The integration of Edge Computing within the vehicular environment is not without challenges
- Some of these challenges were addressed in the various studied work
- Different improvements should be considered for each Edge Computing technology
- Some challenges remain without [complete] answers:
  - Security and privacy
  - Communications reliability
  - Applications placement
  - Integration in the future ecosystem (5G networks)
